# Supplementary material
Source: PubMed Central journal article supplement (PMC6299834)
Supplement: NIHMS998981-supplement-Supp1.pdf [file NIHMS998981-supplement-Supp1.pdf]

**Molecular Cell, Volume 63**

**Supplemental Information**

**DNA Breaks and End Resection Measured**

**Genome-wide by End Sequencing**

**Andres Canela, Sriram Sridharan, Nicholas Sciascia, Anthony Tubbs, Paul Meltzer, Barry P. Sleckman, and André Nussenzweig**

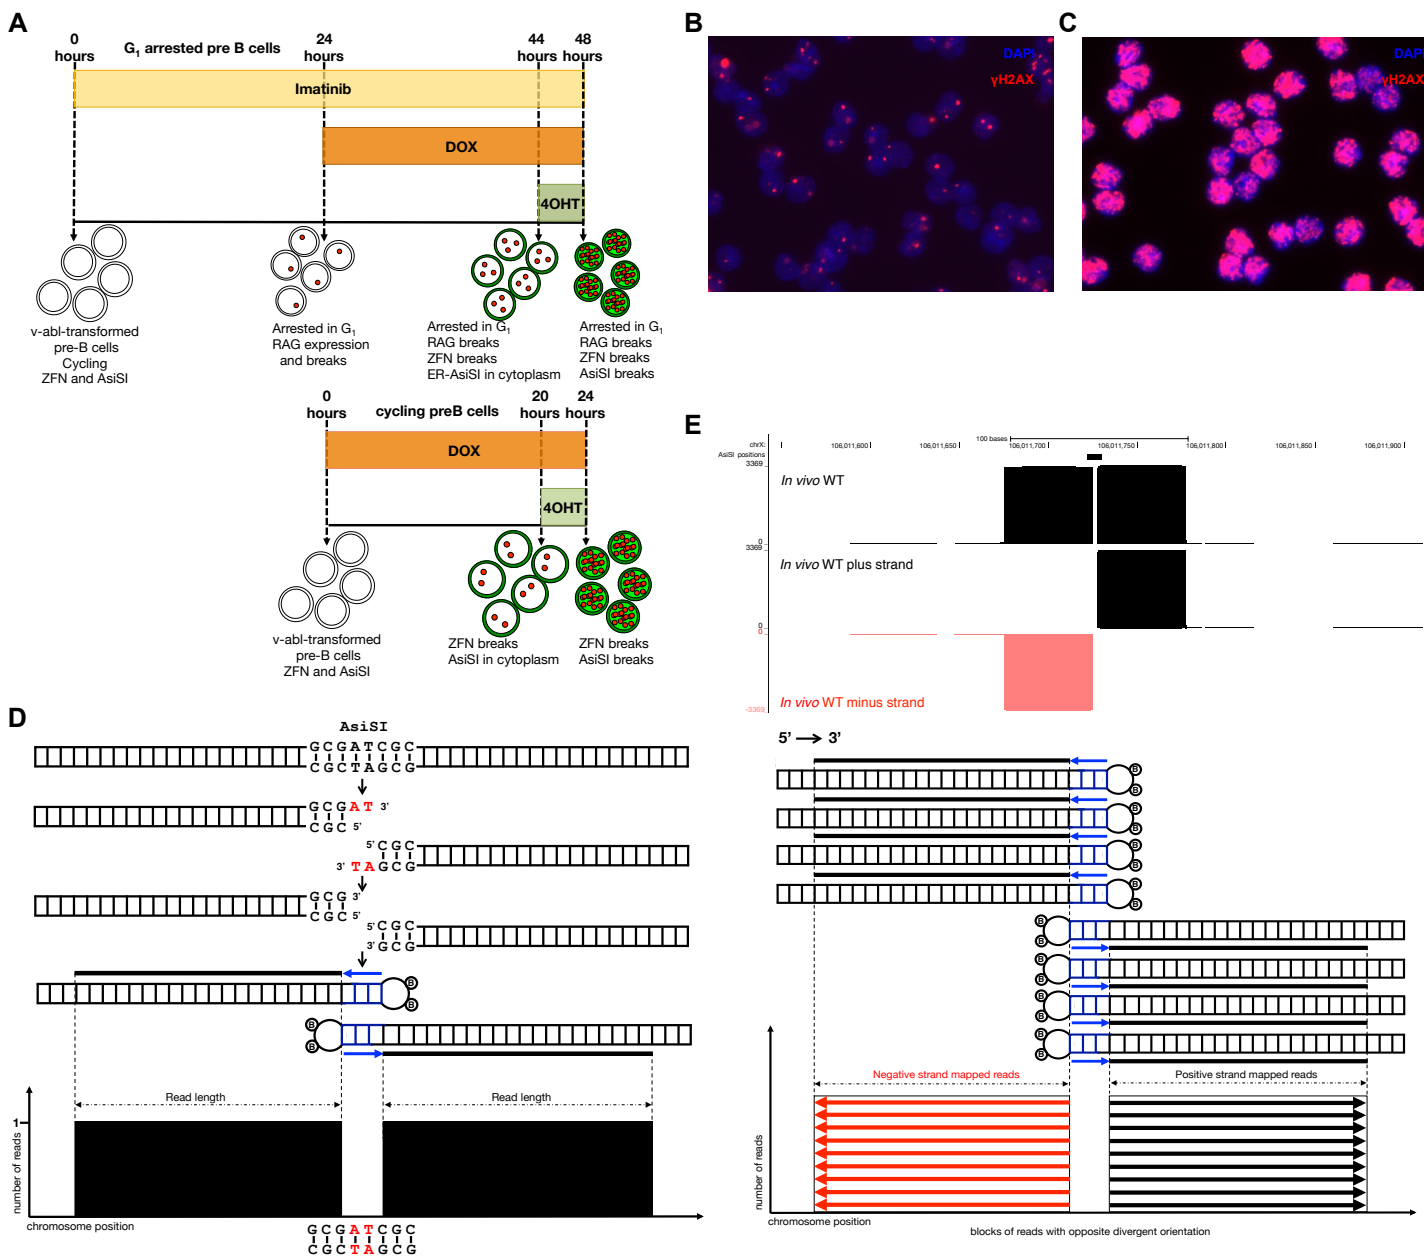

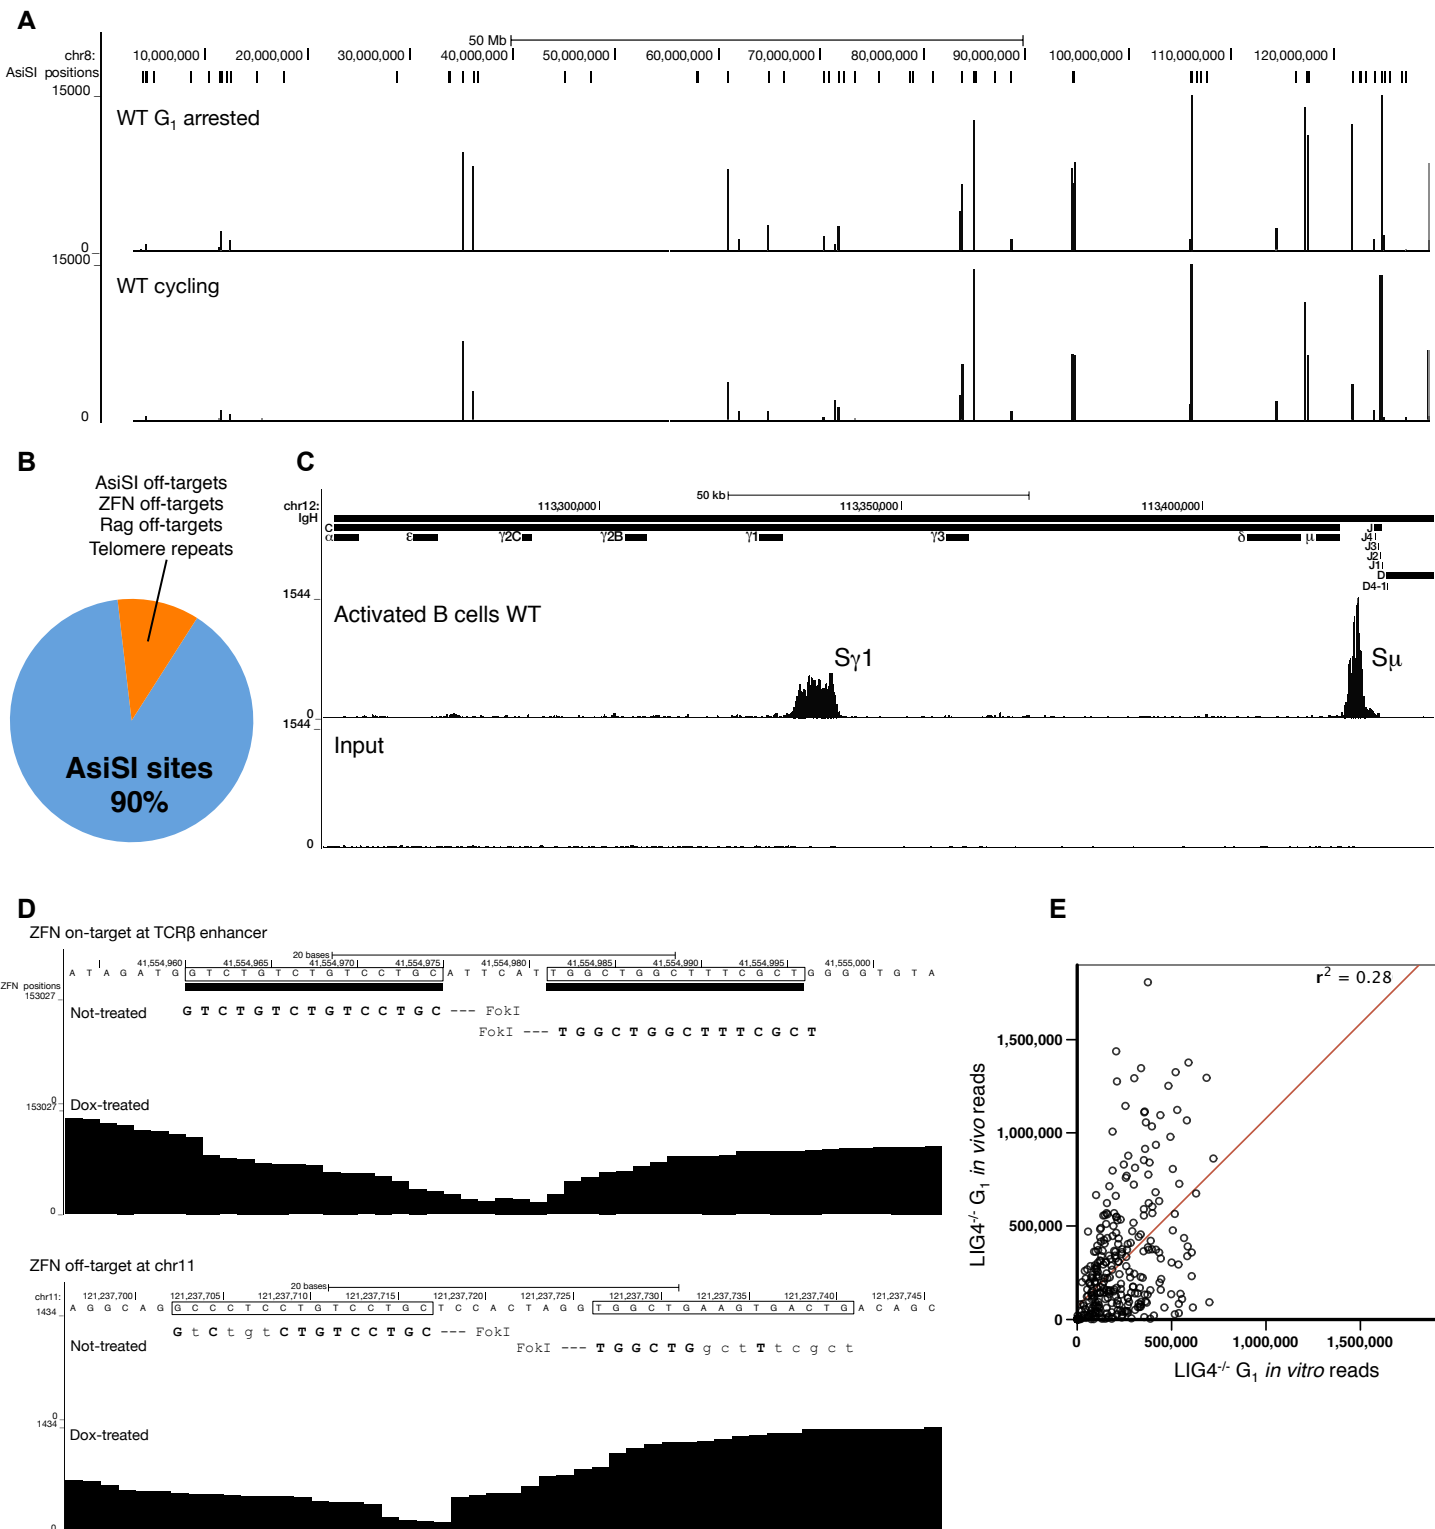

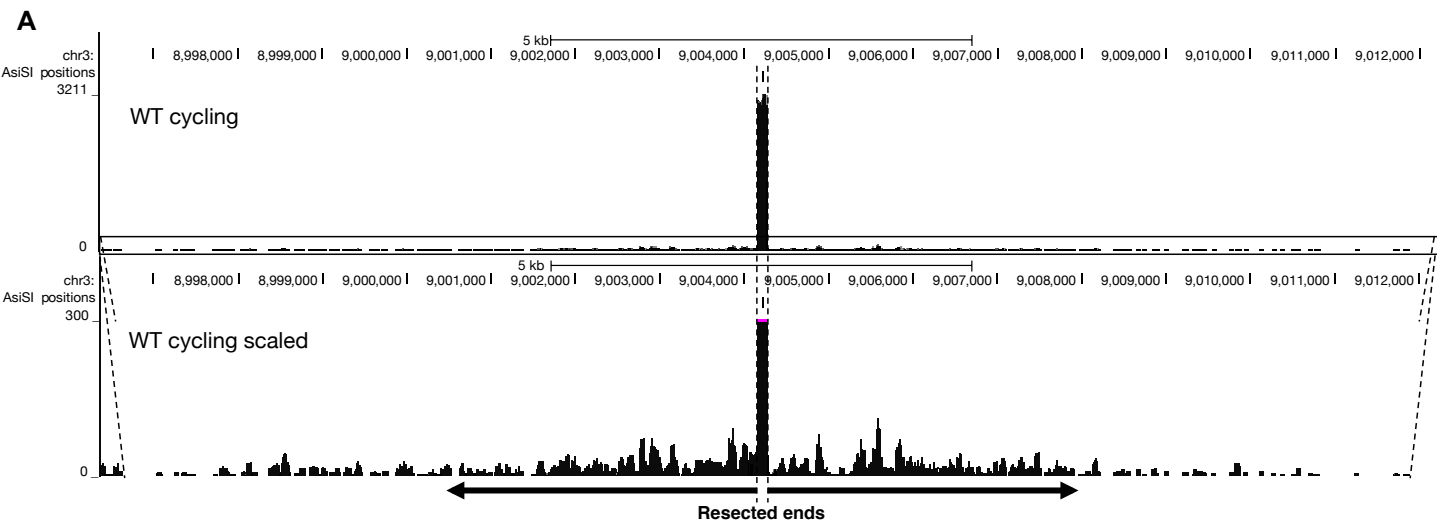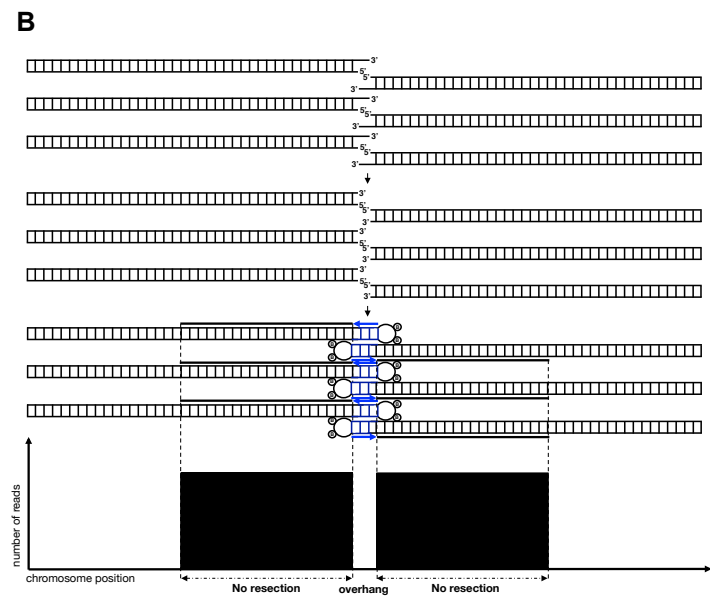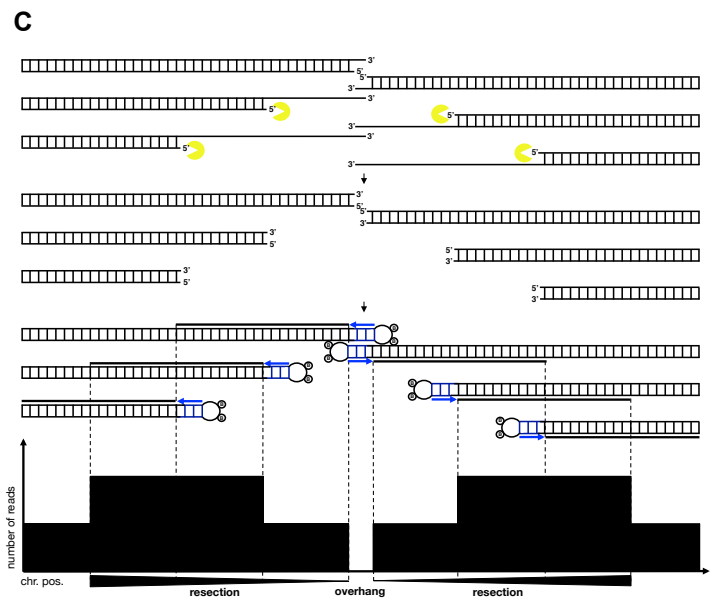

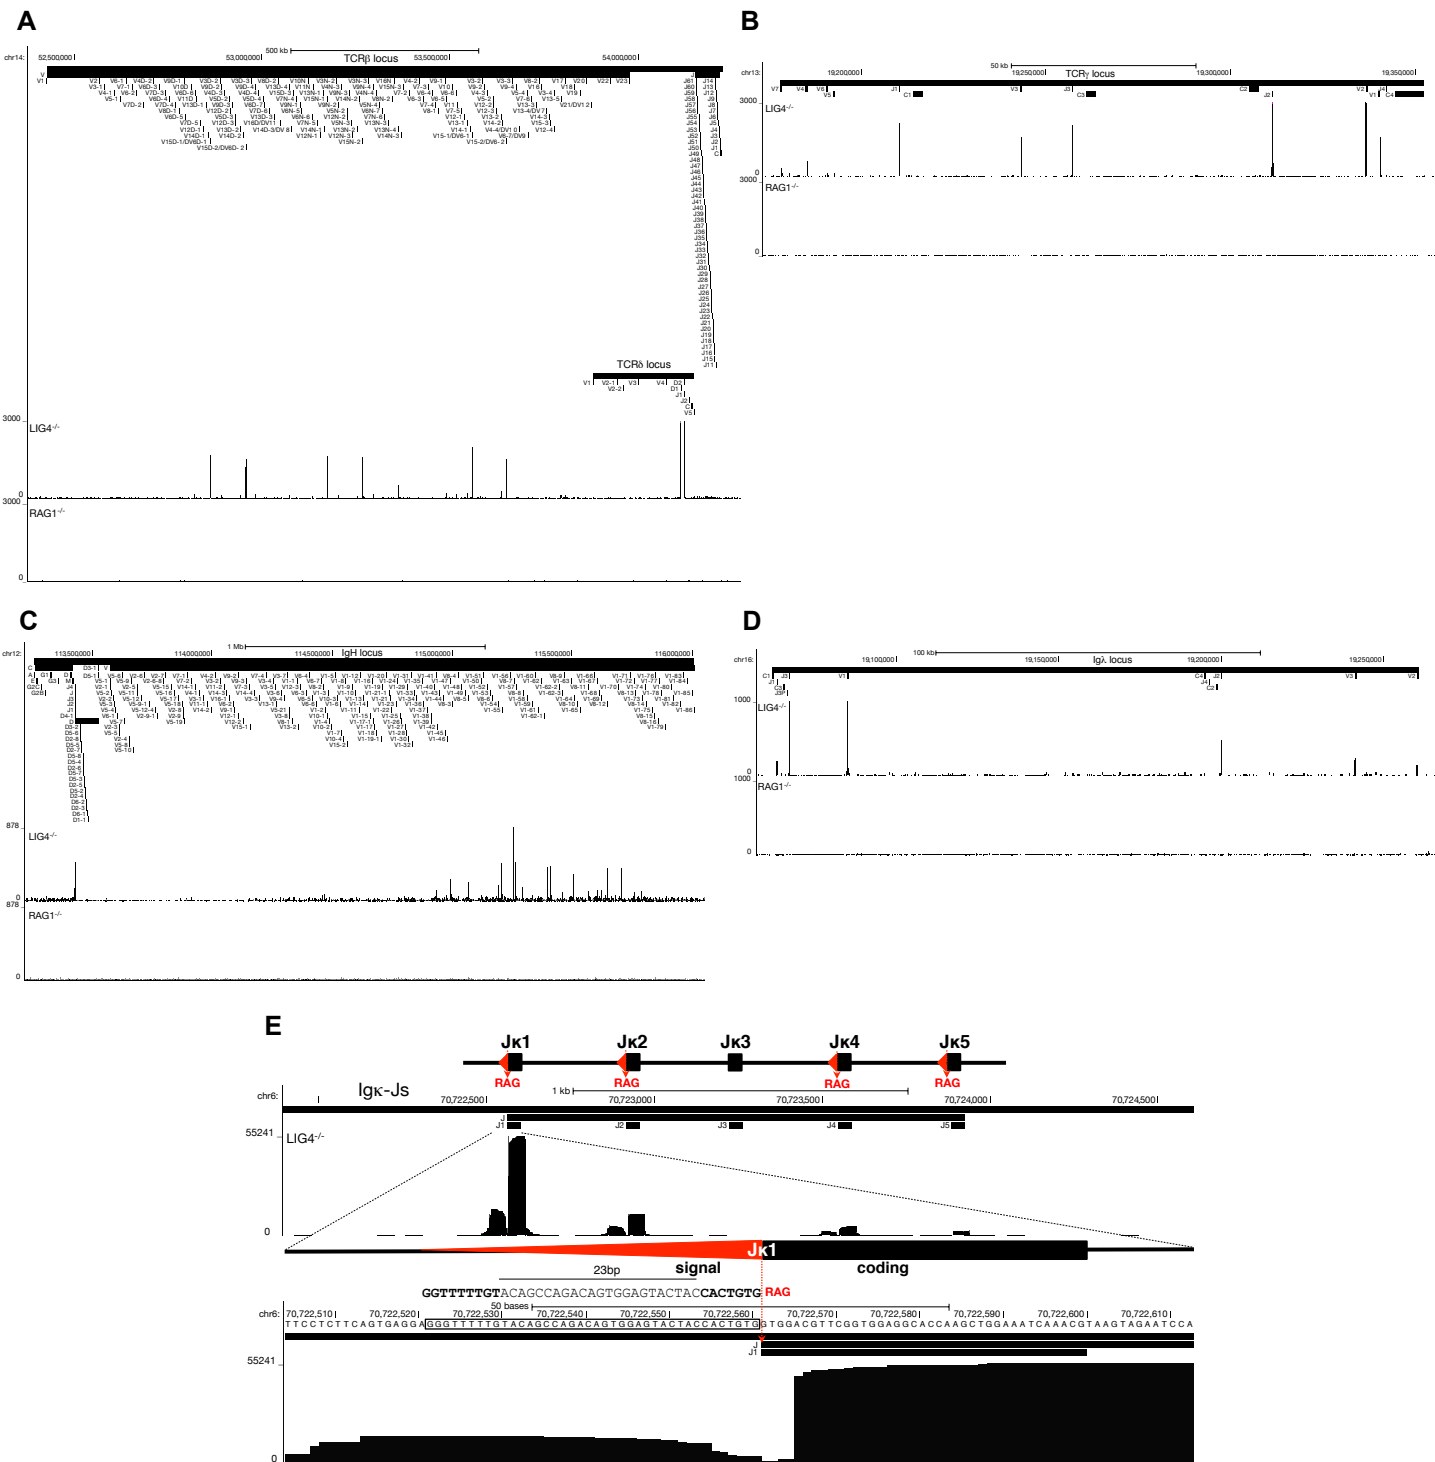

A

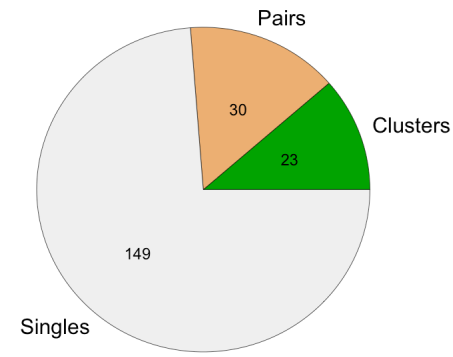

B

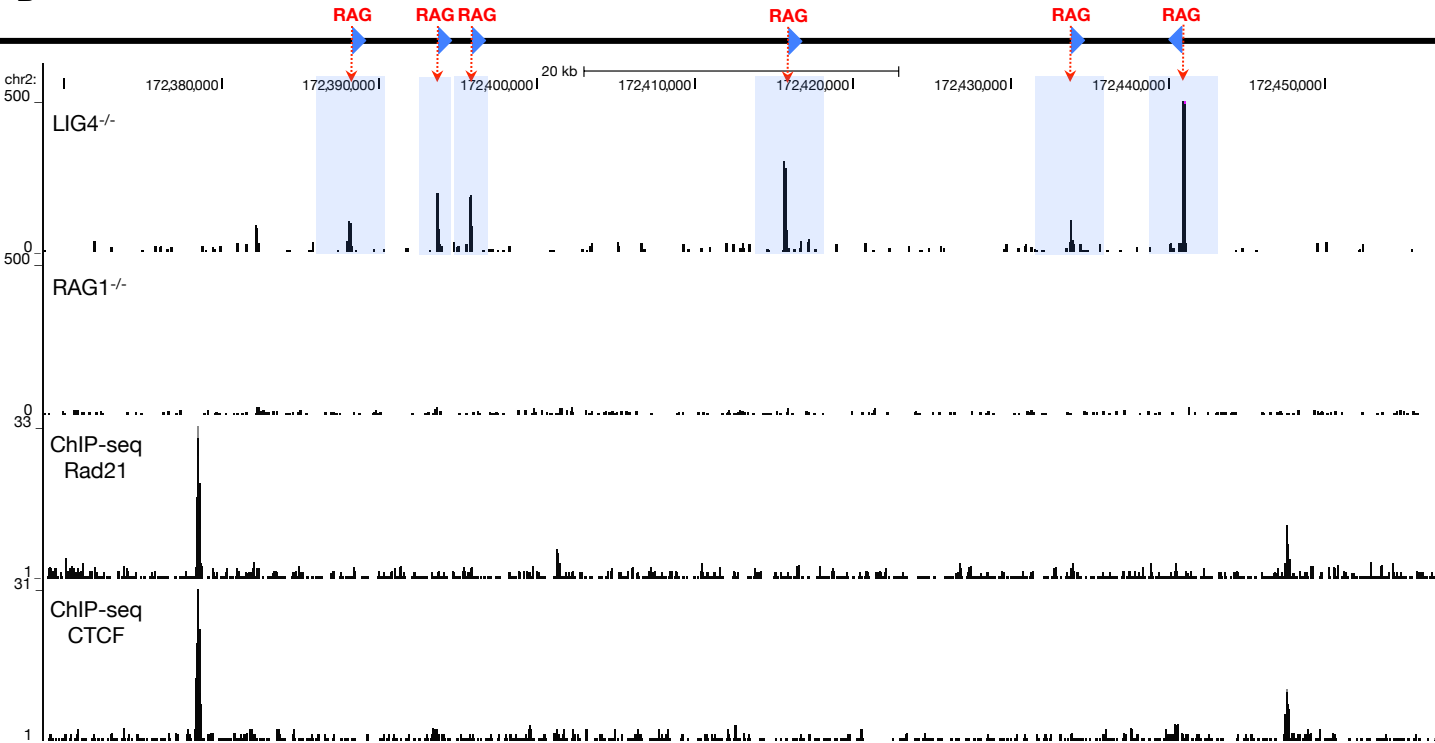



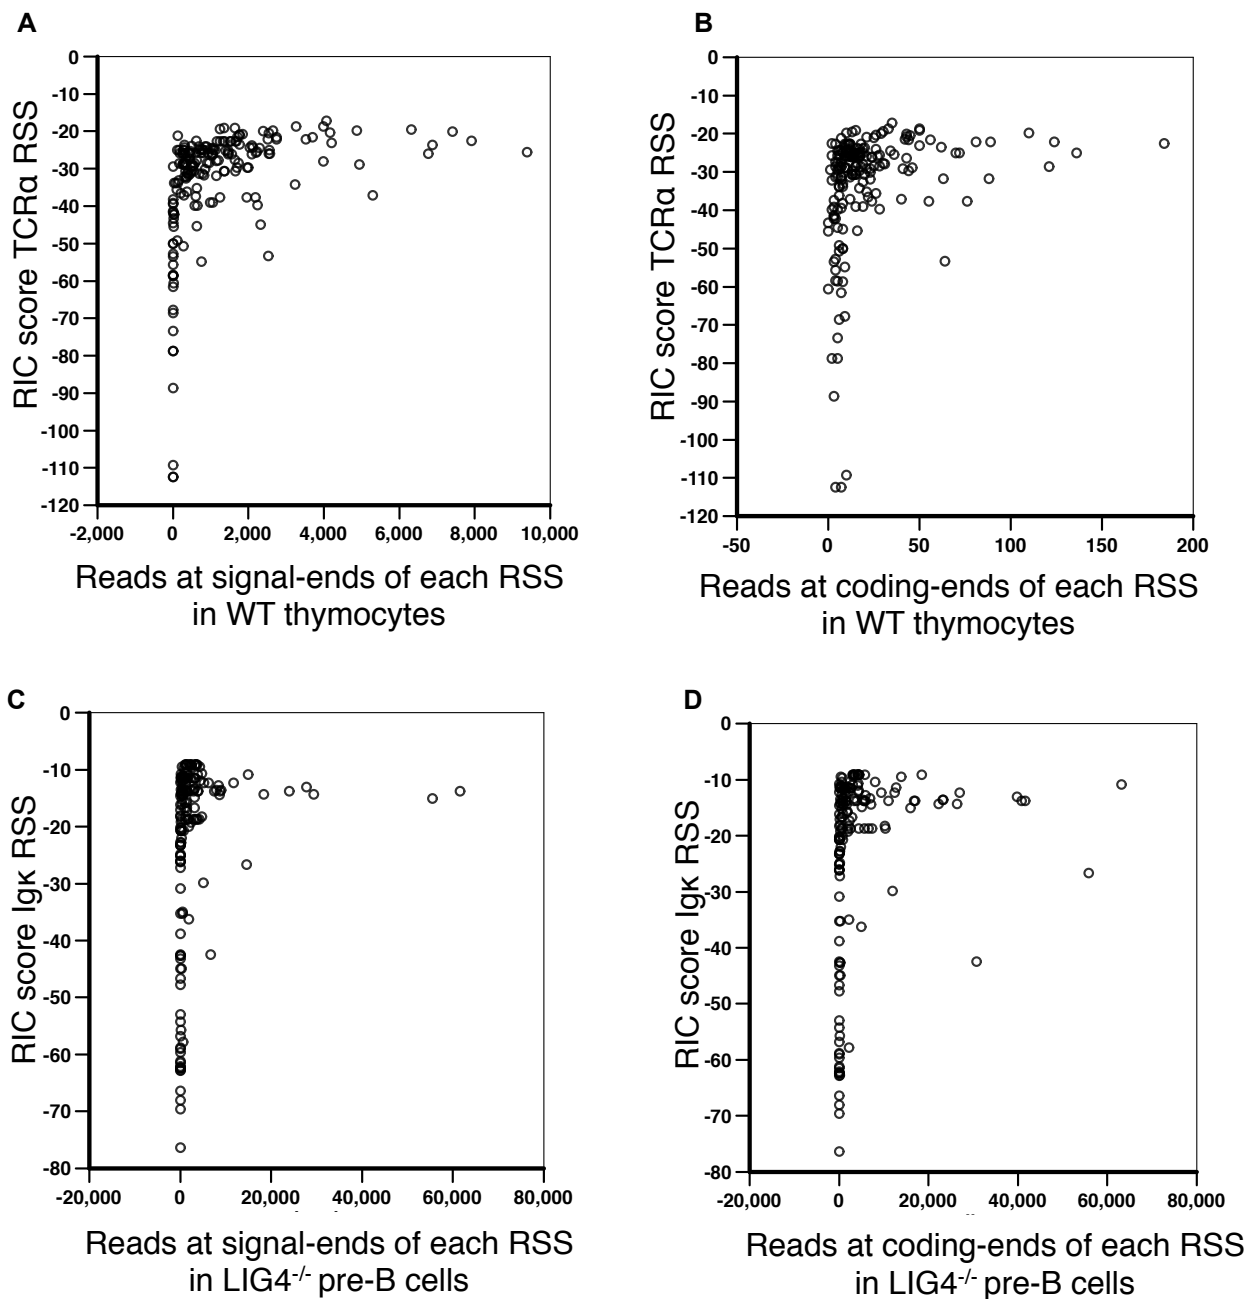



## SUPPLEMENTARY FIGURE AND TABLE LEGENDS

### Figure S1. Breaks detected by $\gamma$ -H2AX and END-seq in pre-B cells, related to Figure 1.

A. Schematic of DSB induction by *AsiSI*, ZFN and RAG endonuclease. DSBs can be produced either in G1 arrested cells (top panel, pre-B imatinib treatment for 48 hours) or in cycling cells (bottom panel). **B.**  $\gamma$ -H2AX (red) immunofluorescence (IF) in *LIG4*<sup>-/-</sup> pre-B cells after 48 hours imatinib treatment to produce RAG breaks **C.**  $\gamma$ -H2AX (red) immunofluorescence (IF) after 48 hours imatinib treatment together with DOX treatment during the last 24 hours and 4OHT treatment during the last 4 hours to simultaneously produce RAG-, ZFN- and *AsiSI*- breaks. **D.** Diagrammatic explanation of END-seq detection of an *AsiSI* break site. **E.** Reads from each end of the two-ended break have opposite divergent orientation. Top panel shows a track corresponding to the same *AsiSI* site shown in Figure 1B with all reads mapped without strand specificity. Below, the reads are split in those mapping to the plus strand (black) and to the minus strand (red). Bottom panel schematic explains how the reads are distributed into the negative strand (red) and positive strand (black).

### Figure S2. *AsiSI* and ZFN on and off-target breaks, related to Figures 2 and 3.

**A.** END-seq reads on chromosome 8 for G1-arrested (top track) and cycling (bottom track) WT pre-B cells 4 hours after *AsiSI* induction. Predicted *AsiSI* sites are indicated above the first track by bars, and y-axes indicate number of reads. **B.** Pie chart showing different type of breaks detected in G1 arrested *LIG4*<sup>-/-</sup> pre-B cells (treated with imatinib, DOX and OHT) identified by peak calling. **C.** END-seq reads at the constant region of the

IgH locus in WT B cells stimulated for class switch recombination for 3 days (top data track) and input control (bottom data track). The positions of the constant, D and J gene segments are displayed on the top. Switching regions  $S_{\gamma 1}$  and  $S_{\mu}$  are indicated. **D.** ZFN on-target (top panel) and a ZFN off-target (bottom panel) DSB detected in DOX treated G1 arrested  $LIG4^{-/-}$  pre-B cells by END-seq. The sequence surrounding both ZFNs is illustrated, with perfect matches indicated in bold upper-case and mismatches in lower-case. **E.** Normalized read count at each broken *AsiSI* site in G1 arrested  $LIG4^{-/-}$  pre-B cells induced for *AsiSI* cleavage *in vivo* vs. *in vitro* digestion with recombinant enzyme in the agarose plug.

**Figure S3. DSB end-resection detected by END-seq, related to Figure 4.**

**A.** Top panel shows the read coverage auto scaled to the highest peak at one *AsiSI* site detected in cycling WT pre-B cells. Bottom panel shows the magnification of the top panel, which reveals END-seq reads that are distal from the initial *AsiSI* site. **B.** Schematic representation of a non-resected end detected by END-seq. **C.** Schematic representation of a resected end detected by END-seq. 5'-3' nucleolytic degradation, represented in yellow, generates 3' overhangs, which are blunted at different positions, and give an irregular pattern of accumulated reads distal to the break site.

**Figure S4. DSBs at antigen receptor loci in pre-B cells, related to Figure 5.**

END-seq reads at  $TCR\alpha$  (**A**),  $TCR\gamma$  (**B**), IgH (**C**), and  $Ig\lambda$  (**D**) for  $LIG4^{-/-}$  (top track) and  $RAG1^{-/-}$  (bottom track). Position of the V, D and J gene segments are indicated at the top. **E.**

Magnified view of RAG-induced DSBs mapped by END-seq at the J $\kappa$  locus. The position of the gene segments (black rectangles) and RSSs (red triangles) are indicated. Top panel shows reads at signal and coding ends for each gene segment. Bottom panel shows a magnification of the DSB at J $\kappa$ 1. While RAG breaks at the signal-ends are precise and blunt, the irregular shape of the reads is caused by end-resection in the absence of LIG4.

**Figure S5. RAG endonuclease on- and off-target activity, related to Figure 5.**

**A.** Pie-chart classification of RAG off-targets. **B.** Example of RAG off-target DSBs in clusters. Tracks at the top show END-seq reads for *LIG4*<sup>-/-</sup> (first data track) and *RAG1*<sup>-/-</sup> (second data track), with off-target DSBs highlighted in blue. Blue triangles represent cryptic RSSs. Third and fourth data tracks show Rad21 and CTCF ChIP-seq respectively.

**Figure S6. DSB repertoire in primary thymocytes, related to Figure 6.**

END-seq reads at the TCR $\beta$  (**A**), TCR $\gamma$  (**B**) and IgH (**C**) loci for WT (top data track) and *RAG2*<sup>-/-</sup> TCR $\beta$  transgenic (bottom data track) thymocytes. The positions of all the V, D and J gene segments are displayed in the top.

**Figure S7. Comparison between RIC store and DSB repertoire, related to Figures 6 and**

**7. A-B.** Plots comparing RIC scores calculated for each RSS at the TCR $\alpha$  locus and total number of reads for signal (**A**) and coding (**B**) ends detected by END-seq in WT thymocytes. **C-D.** Same as (A, B) for Igk locus in *LIG4*<sup>-/-</sup> pre-B cells.

**Table S1. Comparison between END-seq and BLESS at *AsiS1* break sites, related to Figure 1.**

**Table S2. ZFN off-targets and *AsiS1* single nucleotide polymorphisms, related to Figures 1-3.**

**Table S3. RAG off-target DNA breaks associated with c-RSS detected in *LIG4*<sup>-/-</sup> pre B cells, related to Figure 5.**

**Table S4. Relationship between DSBs detected by END-seq, annotated RSSs and RIC scores, related to Figures 6 and 7.**

**Table S5. RAG off-target DNA breaks associated with c-RSS detected in WT and *ATM*<sup>-/-</sup> thymocytes, related to Figures 6 and 7.**

## Supplementary Experimental Procedures

### Cell lines and Immunofluorescence.

Abelson-transformed pre-B cells (Bredemeyer et al., 2006; Lee et al., 2013) were retrovirally transduced with the tetracycline-inducible ER-AsiSI, pTRE3G-HA-ER-AsiSI as previously described (Santos et al., 2014). For RAG induction, pre-B cells were treated with 3  $\mu$ M imatinib for 48h at  $1 \times 10^6$  cells/ml. The ATM kinase inhibitor KU55933 (Tocris) was used at 15  $\mu$ M. For induction of ZFN and ER-AsiSI, pre-B cells were treated with DOX at 1  $\mu$ g/ml for 24h and with 4OHT at 1 $\mu$ M for 4 hours. Immunofluorescent staining with  $\gamma$ -H2AX (JBW301 Millipore, 1/10,000) antibody was performed in parallel in each pre-B cell experiment to verify a proper DSB induction.

### Mice

C57BL/6 WT, *ATM*<sup>-/-</sup> (provided by A. Wynshaw-Boris), and *RAG2*<sup>-/-</sup> mice expressing a V $\beta$ 8 transgene (provided by K. Hathcock) between 4 and 18 weeks of age were used to prepare single cell suspensions from whole thymocytes and splenic B cells (purified using depletion with anti-CD43 beads). For class switch recombination experiments purified splenic B cells were cultured with LPS (25  $\mu$ g/ml; Sigma), IL-4 (5 ng/ml; Sigma) and RP105 (Anti-Mouse CD180 (0.5  $\mu$ g/ml; BD Pharmingen) for 3 days as previously described (Callen et al., 2007).

### RAG off-targets and RIC scores

Following the mapping and aligning of sequence reads, a peak-calling algorithm (SICER) (Zang et al., 2009) was used to identify regions or peaks of significant enrichment around sites of DNA breaks. Each peak was then scanned for the RAG recognition motif - CAC/GTG, and the pattern of sequenced reads surrounding the motif was established. Given that reads linked with a specific RAG-targeted CAC/GTG are expected to be in proximity to that particular motif, a weighting or confidence index was developed as follows: by using a “ $W$ ” base-pair (bp) window centered on each CAC/GTG motif, reads aligning within this window were determined and weighted by an index in which four possible combinations of reads relative to the break/motif site were considered. For each combination, we calculated a downstream and upstream read score from the weighted sums as shown below:

$$\text{Downstream read score} = \frac{\sum_{i=1}^W N_{i_{\text{down}}}^+ * W_i}{\sum_{i=1}^W N_{i_{\text{up}}}^+ * W_i}$$

$$\text{Upstream read score} = \frac{\sum_{i=1}^W N_{i_{\text{up}}}^- * W_i}{\sum_{i=1}^W N_{i_{\text{down}}}^- * W_i}$$

where,  $N_{i_{\text{down}}}^+$  is the number of plus-strand reads at location ‘ $i$ ’ downstream of the DSB.

Similarly,  $N_{i_{\text{up}}}^+$ ,  $N_{i_{\text{up}}}^-$ ,  $N_{i_{\text{down}}}^-$  all denote numbers of reads at relevant locations.  $W_i$

indicates the weighting value used at location ‘ $i$ ’ away from the DSB.

RIC scores were calculated from annotated RSSs using the RSSsite (Merelli et al., 2010).

For gene segments positions and RSS functionality for mouse C57BL/6J Immunoglobulin

and T cell receptor in GRCm38.p3 assembly were obtained from the IMGT Repertoire (Lefranc, 2001).

## References

Bredemeyer, A.L., Sharma, G.G., Huang, C.Y., Helmink, B.A., Walker, L.M., Khor, K.C., Nuskey, B., Sullivan, K.E., Pandita, T.K., Bassing, C.H., *et al.* (2006). ATM stabilizes DNA double-strand-break complexes during V(D)J recombination. *Nature* *442*, 466-470.

Callen, E., Jankovic, M., Difilippantonio, S., Daniel, J.A., Chen, H.T., Celeste, A., Pellegrini, M., McBride, K., Wangsa, D., Bredemeyer, A.L., *et al.* (2007). ATM prevents the persistence and propagation of chromosome breaks in lymphocytes. *Cell* *130*, 63-75.

Lee, B.S., Gapud, E.J., Zhang, S., Dorsett, Y., Bredemeyer, A., George, R., Callen, E., Daniel, J.A., Osipovich, O., Oltz, E.M., *et al.* (2013). Functional intersection of ATM and DNA-dependent protein kinase catalytic subunit in coding end joining during V(D)J recombination. *Molecular and cellular biology* *33*, 3568-3579.

Lefranc, M.P. (2001). IMGT, the international ImMunoGeneTics database. *Nucleic acids research* *29*, 207-209.

Merelli, I., Guffanti, A., Fabbri, M., Cocito, A., Furia, L., Grazini, U., Bonnal, R.J., Milanese, L., and McBlane, F. (2010). RSSsite: a reference database and prediction tool for the identification of cryptic Recombination Signal Sequences in human and murine genomes. *Nucleic acids research* *38*, W262-267.

Santos, M., Faryabi, R.B., Ergen, A., Day, A., Malhowski, A., Canela, A., Onozawa, M., Lee, J.-E., Callen, E., Gutierrez-Martinez, P., *et al.* (2014). DNA-damage induced differentiation of leukemic cells as an anti-cancer barrier. *Nature* *514*, 107-11.

Zang, C., Schones, D.E., Zeng, C., Cui, K., Zhao, K., and Peng, W. (2009). A clustering approach for identification of enriched domains from histone modification ChIP-Seq data. *Bioinformatics* *25*, 1952-1958.
